# Supplementary material
Source: publisher figshare collection journal article supplement (https://wiley.figshare.com/articles/dataset/_/3514172)
Supplement: Supplementary file 1 [file 1]

### *Ecological Archives* A019-026-A3

**Brett G. Dickson, Barry R. Noon, Curtis H. Flather, Stephanie Jentsch, and William M. Block. 2009. Quantifying the multi-scale response of avifauna to prescribed fire experiments in the southwest United States. *Ecological Applications* 19:608–621.**

Appendix C. Methods used to estimate the variance in density difference when  $500 < n < 1000$ , and to account for stratum-level detection probabilities estimated using the multiple covariates.

For all species ( $500 < n < 1000$ ), we derived a modification of the delta method (see Buckland et al. 2001) to estimate  $Var(\hat{\Delta}_s)$ , while accounting for stratum-level detection probabilities estimated using the multiple covariates:

$$Var(\hat{\Delta}_s) = \left[ \sum_{h=1}^4 (c_h \hat{D}_h cv(n_h))^2 \right] + \sum_{h=1}^4 \sum_{l=1}^4 (c_h c_l) (\hat{D}_h \hat{D}_l) \left( \frac{Cov(\hat{p}_h, \hat{p}_l)}{\hat{p}_h \hat{p}_l} \right)$$

where  $c_h$  and  $c_l$  are constants with signs that depend on the comparisons being made with the  $\hat{D}_h$  and  $\hat{D}_l$ , respectively, and where  $\hat{D}_h$  and  $\hat{D}_l$  are the estimated densities for two of four stratum levels,  $h$  and  $l$ . For the pooled number of detections,  $n$ , in each stratum level,  $h$ , we computed

$$cv(n_h) = \frac{\sqrt{\frac{T \sum_{h=1}^k t_h (n_h / t_h - n / T)^2}{k-1}}}{n}$$

where  $k$  is the total number of points within a unit,  $t_h$  is the total number of visits to a stratum,  $T = \sum_{h=1}^k t_h$ , and  $n = \sum_{h=1}^k n_h$  (Buckland et al. 2001). Making the more conservative assumption that the correlation among any pair  $\hat{p}_h, \hat{p}_l = 1$ , we considered  $(s\hat{e}(\hat{p}_h)s\hat{e}(\hat{p}_l))$

to be a reasonable approximation of the covariance among stratum and substituted this product for  $Cov(\hat{p}_h, \hat{p}_l)$ .

#### LITERATURE CITED

Buckland, S. T., D. R. Anderson, K. P. Burnham, J. L. Laake, D. L. Borchers, and L. Thomas. 2001. Introduction to distance sampling. Oxford University Press, London, UK.
